# Supplementary material for: The Defense Response of <em>Sanchezia nobilis </em>against Biotic and Abiotic Stresses
Source: Preprints.org preprint supplement (doi:10.20944/preprints202405.0760.v1), 2024-05-13
Supplement: Supplementary file 2 [file supplementary]

**Supporting information**

**The defense response of *Sanchezia nobilis* against biotic and abiotic stresses**

## Cong Chen, YiminPeng, LinglingLiu, Xiaoxia Cai, Meiling Xu, Zhaoyan Lin, Qianhua Ji*

## Fruit Research Institute / College of Life Sciences, Zhaoqing University, Zhaoqing, Guangdong, 526061, China.

*** Correspondence:**Qianhua Ji
[qhgee@163.com](mailto:djhao@njfu.edu.cn)

**Table S1.** **The height and ground diameter of *S. nobilis* in the green nursery on campus.**

| Tree No. | Height/cm | Ground diameter/cm | Tree No. | Height/cm | Ground diameter/cm |
| --- | --- | --- | --- | --- | --- |
| 1 | 102 | 1.5 | 18 | 110 | 1.6 |
| 2 | 107 | 1.5 | 19 | 108 | 1.6 |
| 3 | 118 | 1.6 | 20 | 118 | 1.7 |
| 4 | 114 | 1.7 | 21 | 125 | 1.8 |
| 5 | 108 | 1.8 | 22 | 124 | 1.6 |
| 6 | 123 | 1.8 | 23 | 114 | 1.6 |
| 7 | 126 | 2 | 24 | 105 | 1.8 |
| 8 | 117 | 1.8 | 25 | 113 | 1.7 |
| 9 | 112 | 1.7 | 26 | 100 | 1.5 |
| 10 | 106 | 1.6 | 27 | 98 | 1.5 |
| 11 | 108 | 1.7 | 28 | 110 | 1.5 |
| 12 | 100 | 1.5 | 29 | 125 | 1.9 |
| 13 | 112 | 1.5 | 30 | 118 | 1.7 |
| 14 | 107 | 1.5 | 31 | 102 | 1.6 |
| 15 | 110 | 1.6 | 32 | 100 | 1.5 |
| 16 | 101 | 1.1 | 33 | 105 | 1.6 |
| 17 | 122 | 1.5 | 34 | 111 | 1.7 |

**Table S1.** **The height and ground diameter of *S. nobilis* in the green nursery on campus.**

| Tree No. | Height/cm | Ground diameter/cm | Tree No. | Height/cm | Ground diameter/cm |
| --- | --- | --- | --- | --- | --- |
| 35 | 101 | 1.6 | 53 | 104 | 1.6 |
| 36 | 106 | 1.5 | 54 | 119 | 1.5 |
| 37 | 99 | 1.6 | 55 | 112 | 1.5 |
| 38 | 120 | 1.7 | 56 | 97 | 1.5 |
| 39 | 113 | 1.7 | 57 | 124 | 1.8 |
| 40 | 118 | 1.6 | 58 | 104 | 1.6 |
| 41 | 126 | 1.8 | 59 | 111 | 1.5 |
| 42 | 117 | 1.8 | 60 | 115 | 1.6 |
| 43 | 121 | 1.7 | 61 | 108 | 2.3 |
| 44 | 126 | 1.9 | 62 | 114 | 1.7 |
| 45 | 120 | 1.6 | 63 | 116 | 1.6 |
| 46 | 117 | 1.5 | 64 | 127 | 1.8 |
| 47 | 124 | 1.6 | 65 | 118 | 1.6 |
| 48 | 105 | 1.7 | 66 | 123 | 1.7 |
| 49 | 114 | 1.7 | 67 | 119 | 1.7 |
| 50 | 98 | 1.5 | 68 | 121 | 1.8 |
| 51 | 105 | 1.6 | 69 | 124 | 1.7 |
| 52 | 116 | 1.7 |  |  |  |

**Table S2.** **The weight of leaves of *S. nobilis*.**

| Leaf No. | Healthy leaf/g | Leaf after feeding/g |
| --- | --- | --- |
| 1 | 4.641 | 4.0508 |
| 2 | 4.9601 | 4.3732 |
| 3 | 4.9431 | 4.2691 |
| 4 | 4.7695 | 3.9884 |
| 5 | 5.0112 | 4.2715 |
| 6 | 4.7821 | 4.2265 |
| 7 | 4.9896 | 4.3613 |
| 8 | 4.7654 | 4.0727 |
| 9 | 4.8235 | 4.2796 |
| 10 | 5.0125 | 4.3214 |
| 11 | 4.9217 | 4.3052 |
| 12 | 4.8257 | 4.1629 |
